# Supplementary material for: Genome-Wide Identification and Expression Profile of the HD-Zip Transcription Factor Family Associated with Seed Germination and Abiotic Stress Response in Miscanthus sinensis
Source: MDPI journal article supplement (doi:10.3390/genes13122256), 2022-11-30
Supplement: s1 [file s1]

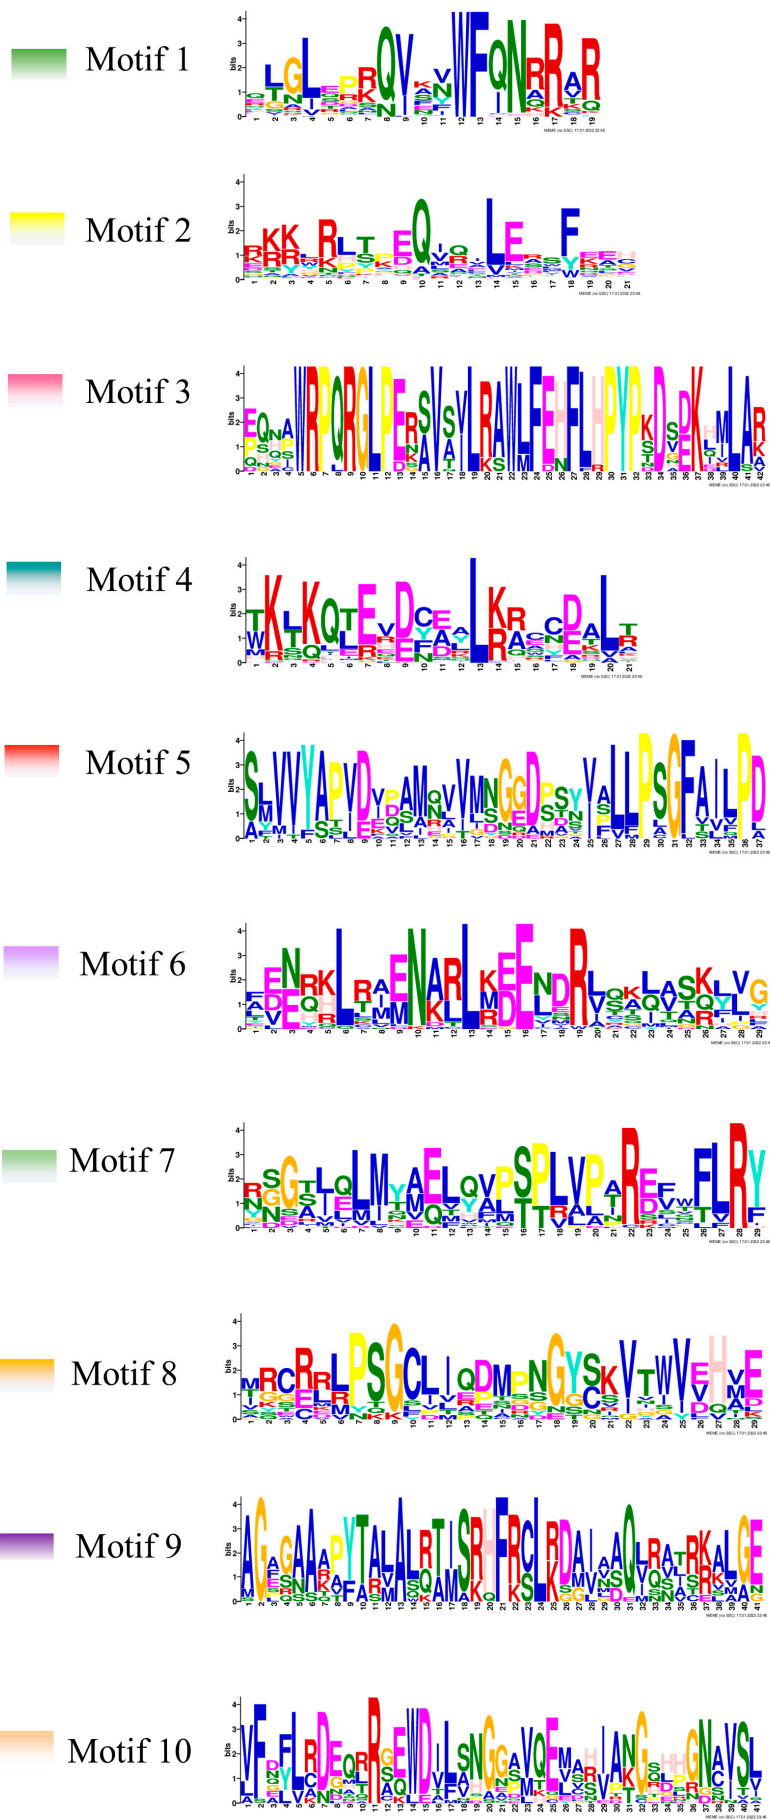

**Figure S1.** The details of the sequence logos of each motif.

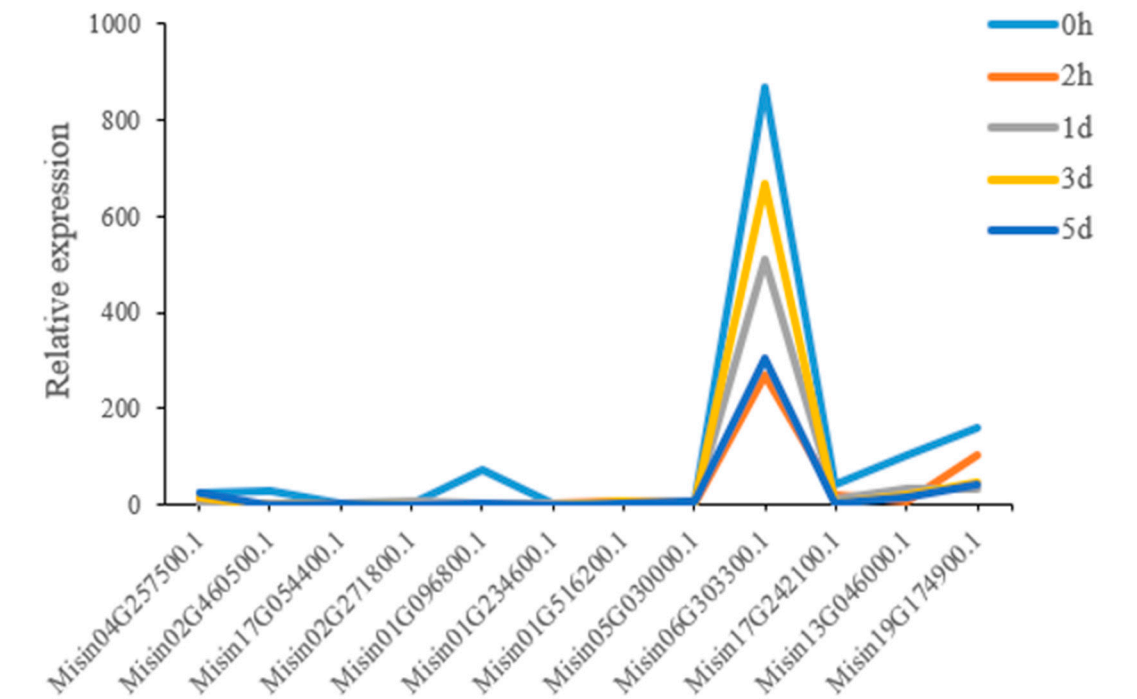

**Figure S2.** Expression profiles of 12 genes at the same time point, including 0 h, 2 h, 1 d, 3 d, 5 d, in response to seed germination.
